# Supplementary material for: The identification of protein and RNA interactors of the splicing factor Caper in the adult Drosophila nervous system
Source: Frontiers journal article supplement (doi:10.3389/fnmol.2023.1114857), 2023-06-23
Supplement: Table_2.XLSX [file Table_2.XLSX]

## Sheet: Gravitaxis Lines
Table S2. Mutant Fly Lines Used for Gravitaxis Screen
Affected gene	Allele	Bloomington Stock #	Protein-Protein Interaction	Protein-RNA Interaction	Protein-RNA Interaction
Acinus (Acn)	Acn[fs1]	6102	Yes (Both)		Yes (Both)
Acinus (Acn)	TI{CRIMIC.TG4.2}Acn[CR00866-TG4.2]	79328
Ataxin-2 (Atx2)	P{PZ}Atx2[06490]	11688	Yes (FLAG only)		Yes (Both)
cardinal (cd)	cd[1]	3052	No		No
chickadee (chic)	chic[221]	4892	No		Yes (Caper only)
Chondrocyte-derived ezrin-like domain containing protein (Cdep)	Mi{MIC}Cdep[MI01767]	40178	Yes (Caper only)		No
Collapsin Response Mediator Protein (CRMP)	CRMP[supK1]	40954	No		No
Collapsin Response Mediator Protein (CRMP)	CRMP[supla1]	40955
Cytochrome P450 6a16 (Cyp6a16)	Mi{ET1}Cyp6a16[MB05000]	24315	No		No
Disabled (Dab)	Dab[1]	32653	Yes (Caper only)		No
Disabled (Dab)	Dab[2]	32654
discs overgrown (dco)	dco[S]	80977	Yes (Caper only)		Yes (FLAG only)
discs overgrown (dco)	dco[L]	80978
Eb1	Eb1[2]	5888	No		No
genderblind (gb)	P{SUPor-P}gb[KG07905]	14670	No		No
Glucocerebrosidase 1b (Gba1b)	Mi{ET1}Gba1b[MB03039]	23602	No		Yes (Caper only)
IGF-II mRNA-binding protein (Imp)	Imp7	N/A	Yes (Both)		No
IGF-II mRNA-binding protein (Imp)	Imp8	N/A
IGF-II mRNA-binding protein (Imp)	P{GSV1}Imp[s-40]	43511
Kainate-type ionotropic glutamate receptor subunit 1D (KaiR1D)	PBac{WH}KaiR1D[f03502]	18663	Yes (Caper only)		No
lark	P{EPgy2}lark[EY23084]	22604	Yes (Caper only)		Yes (Both)
longitudinals lacking (lola)	lola[e76]	28283	No		Yes (Both)
maleless (mle)	mle[9]	5873	Yes (Caper only)		Yes (FLAG only)
methuselah (mth)	P{lacW}mth[1]	27896	No		No
Nicotinamide mononucleotide adenylyltransferase (Nmnat)	Mi{MIC}Nmnat[MI08919]	50493	No		Yes (FLAG only)
numb	P{hsneo}numb[1]	4096	Yes (Caper only)		No
Ornithine aminotransferase precursor (Oat)	Mi{MIC}Oat[MI07328]	43126	No		No
par-1	P{lacW}par-1[k06323]	10615	Yes (Caper only)		No
Purine-rich binding protein-α (Pur-α)	Mi{MIC}Pur-alpha[MI02955]	61698	Yes (Both)		No
quaking related 58E-1 (qkr58E-1)	P{EP}qkr58E-1[G13470]	28401	Yes (Caper only)		Yes (Both)
quaking related 58E-13(qkr58E-3)	qkr58E-3[minus]	40966	No		Yes (FLAG only)
Relish (Rel)	Rel[E20]	55714	No		Yes (Both)
reversed polarity (repo)	repo[1]	4162	No		Yes (Both)
reversed polarity (repo)	P{PZ}repo[03702]	11604
rumpelstiltskin (rump)	rump[1]	57697	Yes (Caper only)		No
scabrous (sca)	P{GawB}sca[109-68]	6479	No		No
shaggy (sgg)	sgg[1]	4095	No		No
singed (sn)	sn[3]	113	No		No
snail (sna)	sna[sco]	2551	No		No
Superoxide dismutase 2 (Mn) (Sod2)	Sod2[n283]	34060	No		No
Suppressor of ER stress-induced death (superdeath)	Mi{MIC}superdeath[MI05739]	43681	No		No
Syncrip (Syp)	Mi{MIC}Syp[MI06413]	43886	Yes (Both)		No
Syncrip (Syp)	Mi{MIC}Syp[MI11035]	55577
Syncrip (Syp)	Mi{PT-GFSTF.1}Syp[MI06413-GFSTF.1]	59298
Syncrip (Syp)	PBac{WH}Syp[f03775]	85668
tan (t)	t[1]	130	Yes (FLAG only)		No
tan (t)	t[3]	132
transient receptor potential-like (trpl)	Mi{ET1}trpl[MB10553]	29134	No		No
Tudor staphylococcal nuclease (Tudor-SN)	P{TKO.GS04319}attP40	82826	No		No
wingless (wg)	wg[Sp-1]	76357	No		No
Zinc-finger protein at 72D (Zn72D)	Zn72D[1]	5061	Yes (Caper only)		Yes (FLAG only)
Bolded lines denote gravitaxis hits
